# Supplementary material
Source: Research Square preprint supplement (doi:10.21203/rs.3.rs-9172555/v1)
Supplement: Supplementary file 1 [file 906d046c83d1c504230d3bc1.docx]

**Table 1: Characteristics of study participants**

| **Variable** | **Frequency (n)** | **Percentage (%)** |
| --- | --- | --- |
| **Mean Age (SD)** | 15.39 ± (1.29) years |  |
| **Gender**  Male  Female | 255  295 | 46.4  53.6 |
| **School Type**  Public  Private | 298  252 | 54.2  45.8 |
| **Father’s Education**  Primary or less  Secondary  Tertiary | 57  172  321 | 18.7  46.3  35.0 |
| **Mother’s Education**  Primary or less  Secondary  Tertiary | 57  195  298 | 10.4  35.5  54.2 |
| **Class**  JSS 3  SSS 1  SSS 2 | 99  326  125 | 18.0  59.3  22.7 |
| **Daily Reading Time (hours)**  <1  2  >3 | 180  250  170 | 30.0  41.7  28.3 |
